## Research Article

# Molecular characterization of transesterification activity of novel lipase family I.1

**Titin Haryati<sup>1,2</sup>, Made Puspasari Widhiastuty<sup>3</sup>, Fida Madayanti Warganegara<sup>3</sup> and Akhmaloka Akhmaloka<sup>3,4</sup>**

<sup>1</sup> Doctoral Program of Chemistry, Faculty of Mathematics and Natural Science, Institut Teknologi Bandung, Jl. Ganesha 10, Bandung, 40132, Jawa Barat, Indonesia; <sup>2</sup> Indonesia, National Research and Innovation Agency, Gedung B.J. Habibie Jalan M.H. Thamrin Nomor 8, Jakarta Pusat 10340, Indonesia; <sup>3</sup> Biochemistry Research Group, Faculty of Mathematics and Natural Science, Institut Teknologi Bandung, Jl. Ganesha 10, Bandung, 40132, Jawa Barat, Indonesia; <sup>4</sup> Department of Chemistry, Faculty of Science and Computer, Universitas Pertamina, Jl. Teuku Nyak Arief, Jakarta Selatan, Jakarta, 12220, Indonesia

**Correspondence:** Akhmaloka Akhmaloka (loka@chem.itb.ac.id)

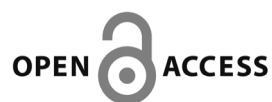

Lipase's thermostability and organic solvent tolerance are two crucial properties that enable it to function as a biocatalyst. The present study examined the characteristics of two recombinant thermostable lipases (Lk2, Lk3) based on transesterification activity. Conversion of C12–C18 methyl ester with paranitrophenol was investigated in various organic solvent. Both lipases exhibited activity on difference carbon chain length (C12 - C18, C18:1, C18:2) of substrates. The activity of Lk2 was higher in each of substrate compared with that of Lk3. Experimental findings showed that the best substrates for Lk2 and Lk3 are C18:1 and C18:2 respectively, in agreement with the computational analysis. The activity of both enzymes prefers on nonpolar solvent. On nonpolar solvent the enzymes are able to keep its native folding shown by the value of radius gyration, solvent–enzyme interaction and orientation of triad catalytic residues. Lk3 appeared to be more thermostable, with maximum activity at 55°C. The presence of Fe<sup>3+</sup> increased the activity of Lk2 and Lk3. However, the activity of both enzymes were dramatically decreased by the present of Ca<sup>2+</sup> despite of the enzymes belong to family I.1 lipase known as calcium dependent enzyme. Molecular analysis on His loop of Lk2 and Lk3 on the present of Ca<sup>2+</sup> showed that there were shifting on the orientation of catalytic triad residues. All the data suggest that Lk2 and Lk3 are novel lipase on the family I.1 and both lipase available as a biocatalyst candidate.

## Introduction

Lipase are a group of hydrolase enzymes showing broad catalytic capabilities, including hydrolysis, esters synthesis, transesterification (acidolysis, interesterification and alcoholysis) and also aminolysis [1,2]. Lipase families were grouped into eight families and six sub-families of true lipase [3]. Today, lipase families comprise 35 families and 11 subfamilies of true lipase [4,5]. Lipases are used in a variety of industries, including agriculture, detergents, food, nutraceuticals and biodiesels [6].

Organic solvents are used in the majority of industrial-scale synthetic processes because of their ability to alter reaction balance toward synthetic direction and ease of product recovery, higher activity and stability, stereoselectivity and regiospecificity. [7]. Therefore, searching for organic solvent tolerance lipase is very important. Tolerance on organic solvents is positively correlated with thermostability [8]. These two characteristics make lipase can be fulfilled as industrial biocatalyst.

Thermostable and solvent tolerance enzymes could be obtained through protein engineering strategies in collaboration with discovery of new lipase [9]. However, protein engineering strategy requires a complete understanding of the structure of lipase using pre-characterized or commercial lipases. Hence, discovery of new lipase with both specific characteristic are important and needed to be explore. The source of a new lipases could be obtained by screening from cultivated microorganisms or metagenome approach [9–13].

Received: 06 April 2022  
Revised: 13 September 2022  
Accepted: 13 September 2022

Accepted Manuscript online:  
16 September 2022  
Version of Record published:  
07 October 2022

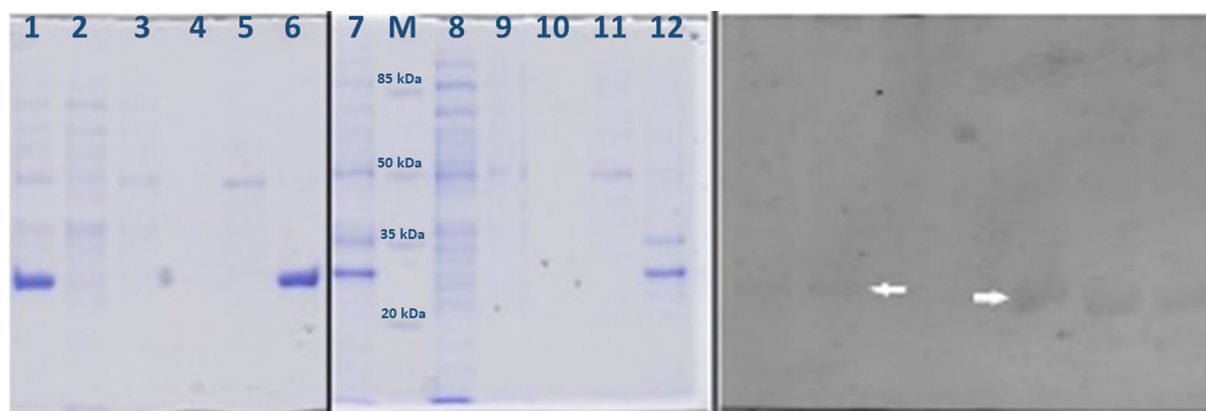

**Figure 1. Profile SDS-PAGE Lk2 and Lk3 of the purified protein**

(A) [M] Protein marker III (pre-stained), peqGOLD, [1] Lk3 crude extract, [2] Lk3 flowthrough fraction, [3] Lk3 wash fraction, [4] Lk3 final wash fraction, [5] Lk3 Elution fraction (10 mM imidazole), [6] Lk3 Elution fraction (100 mM imidazole), [7] Lk2 crude extract, [8] Lk2 flowthrough fraction, [9] Lk2 wash fraction, [10] Lk2 final wash fraction, [11] Lk2 Elution fraction (10 mM imidazole), [12] Lk2 Elution fraction (100 mM imidazole). (B) Zymogram of Lk2 [1] and Lk3 [2]; (arrow) bands of active band proteins.

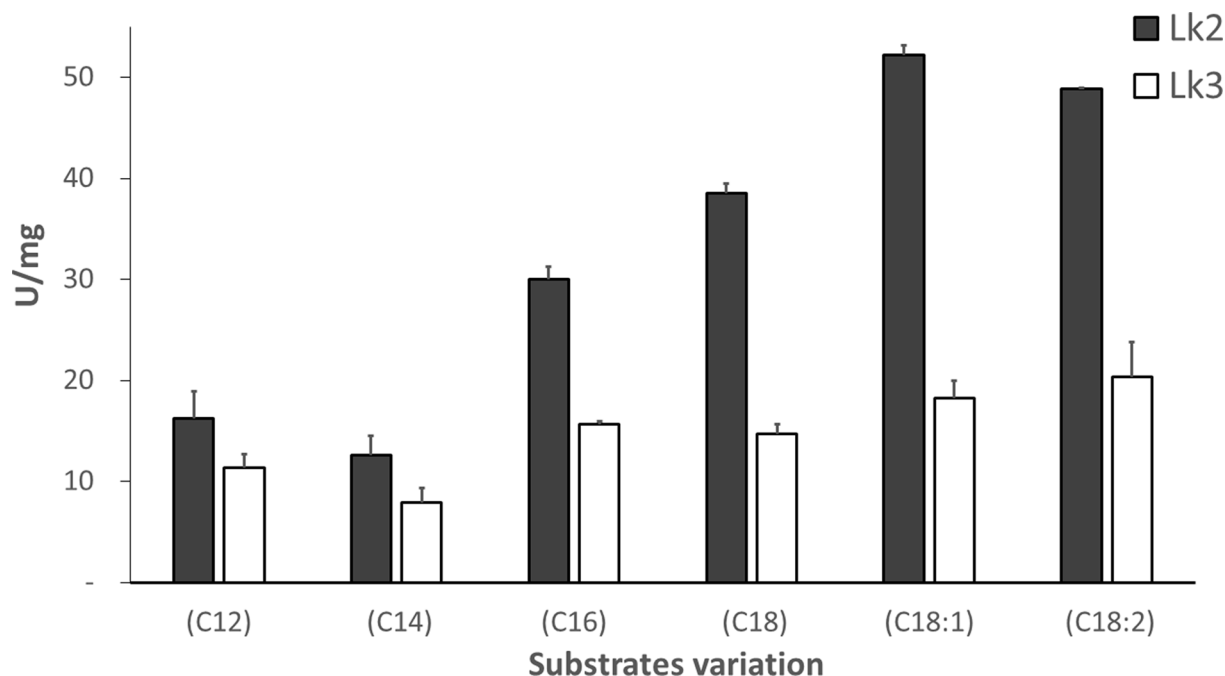

**Figure 2. Specific activity of purified protein on variation of long carbon chain substrates**

(C12) denotes methyl laurate, (C14) methyl myristate, (C16) methyl palmitate, (C18) denotes methyl stearate, (C18:1) denotes methyl oleate, and (C18:2) denotes methyl linoleate.

*Pseudomonas* sp. lipase are emerging biocatalysts with thermostable and organic solvent tolerance character. Amano has marketed lipases from *P. cepacia* (Lipase PS) and *P. fluorescens* (Lipase AsK) [14]. The other widely used *Pseudomonas* lipase is *Pseudomonas stutzeri* lipase which have aminolysis and transesterification activity and also have enantiomer selectivity [15–18]. Studies of metagenomics related to *P. stutzeri* lipase have so far been rare.

This report investigated Lk2 and Lk3 thermostability and characterized transesterification activity in organic solvents. The enzymes are recombinant thermostable lipases isolated by metagenomic approach from domestic compost [19]. Based on homological analysis, the lipases are most closely related to *P. stutzeri* lipase belonging to family I.1. Both lipases have been characterized based on hydrolysis activity [13]. In *Escherichia coli* BL21(DE3), Lk2 and Lk3 are overexpressed and extracted as active soluble enzymes using the thermolysis technique. As the physiological and

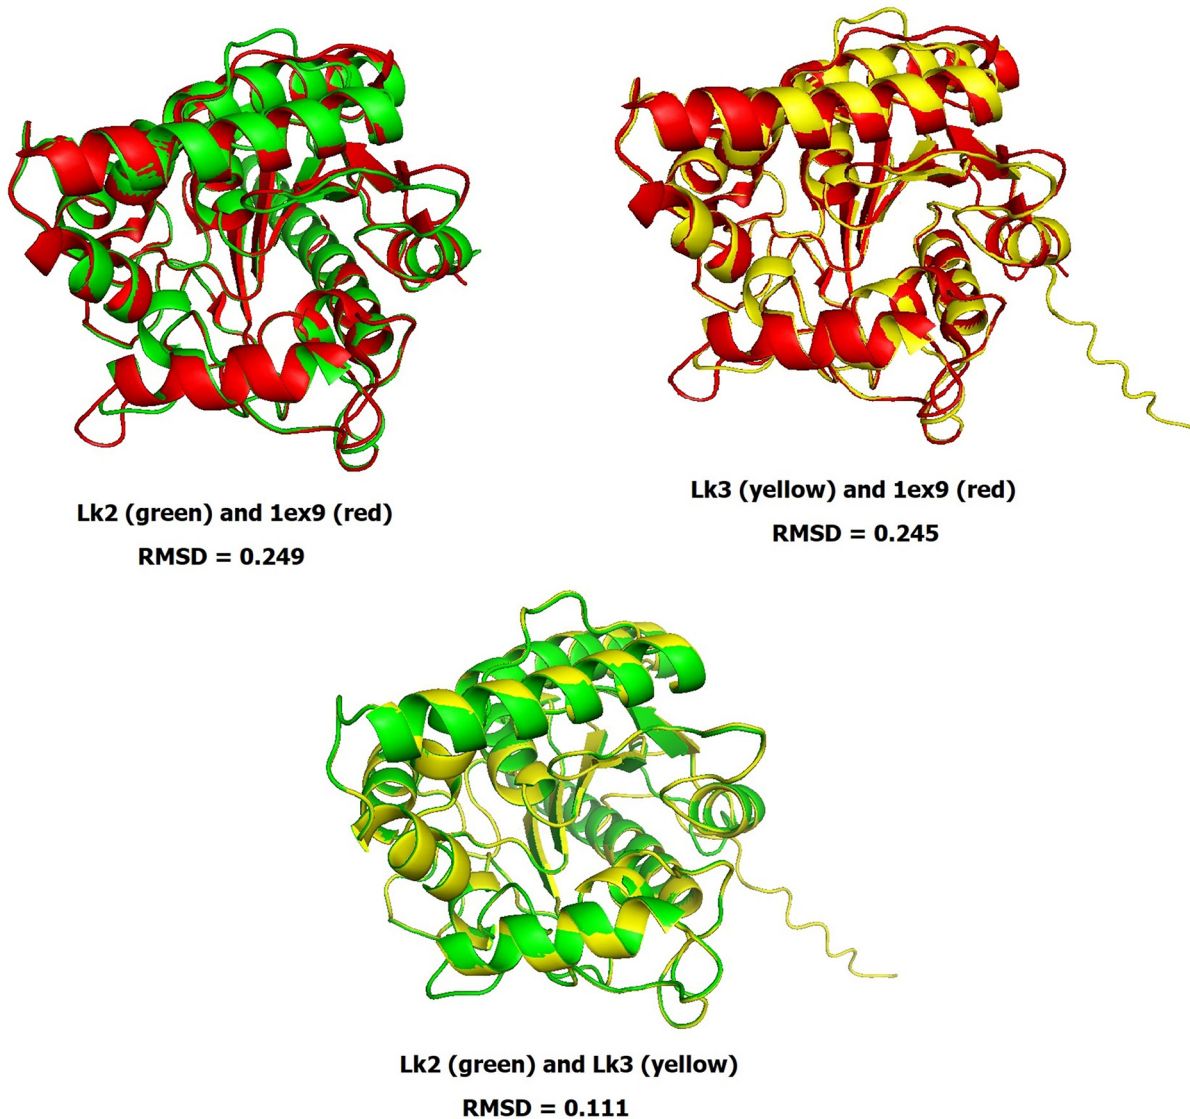

**Figure 3.** Structure similarity of the *Pseudomonas aeruginosa* lipase (1ex9) with Lk2 and Lk3

These structures generated and aligned by Pymol software.

biochemical properties of Lk2 and Lk3 may differ despite being obtained from the same source, experimental and *in silico* analysis were carried out to probe a better understanding on molecular interactions of lipase–substrate, ion metal, and thermostability.

## Materials and methods

### Chemicals, plasmids and bacterial strains

Lipase genes *LK2* and *LK3* were obtained from our collection. The recombinant plasmid pET-30a(+)-*LK2* and pET-30a(+)-*LK3* were transformed into *E. coli* strain BL21 (DE3) (15). pET-30a (+) plasmids vector were used as an expression vector. All of the chemicals were bought from Merck (Merck, Germany) and Sigma (Sigma, Chemicals, U.S.A.).

### Heterologous expression

LB medium contained kanamycin sulfate (50 g/ml) was used to cultivate *E. coli* BL21 (DE3) with recombinant plasmid and shaken at 150 rpm at 37°C. IPTG was added at a final concentration of 1 mM, and the mixture was incubated

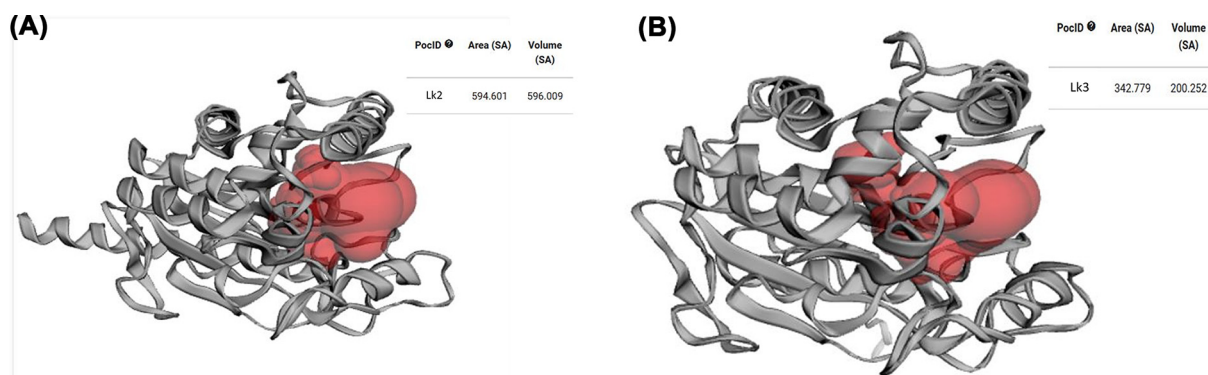

**Figure 4. Binding pockets and cavities**  
(A) Lk2. (B) Lk3 generated by CASTp 3.0 program.

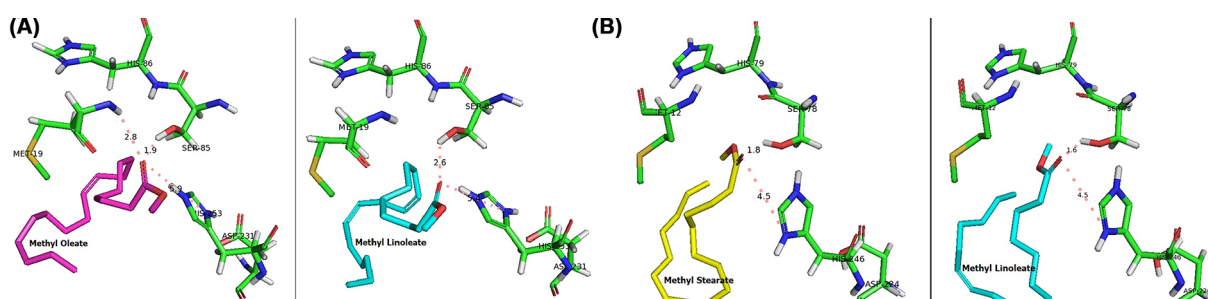

**Figure 5. Enzyme-substrate interaction**  
(A) Lk2-methyl oleate (purple) and methyl linoleate (blue). (B) Lk3-methyl linoleate (blue) and methyl stearate (yellow). Interaction distance in Angstrom ( $\text{\AA}$ ). Autodock Vina was used to dock the enzyme-substrate coordinates generated by the Pymol program.

at 37°C for 4 h when the 600 nm absorbance was 0.6–0.7. Centrifugation was employed to extract cells, which were then stored at  $-20^{\circ}\text{C}$  until needed.

### Membrane cell disruption by thermolysis

By adding 0.1% sodium dodecyl sulfate (SDS), The cells were resuspended in 50 mM sodium phosphate buffer (pH 8.0) and incubated for 30 min at 50°C. After centrifuging the mixture for 30 min at 11900 g, the supernatant was recovered. To avoid denaturation, the supernatant was settled with a 30 mM  $\text{K}_2\text{HPO}_4$  buffer.

### SDS-PAGE and zymography

SDS-PAGE was done at 110 V on a 12% running gel with SDS running buffer. Protein bands were visualized by using 0.1% Commassie Brilliant Blue to stain the gel. The purified enzyme's molecular mass was calculated using Protein marker III (pre-stained), peqGOLD Protein Ladder. The polyacrylamide gel-embedded lipase was renatured with 50 ml of sodium phosphate buffer (50 mM, pH 8) containing 0.1% tritone overnight in preparation for the zymographic examination. Subsequently, 1-naphthalene laurate was incubated with lipase in 50 ml sodium phosphate buffer (50 mM, pH 8) at 50°C for 4 h. By adding 25 mg of fast blue dye, the staining activity was performed.

### Purification of recombinant lipase

Ni-NTA agarose matrix (1.5 ml) on column was balanced with 12 ml miliQ water, After that, 15 ml PBS 50 mM at pH of 8 (1% (V/V) Triton-X 100, 100 mM NaCl) were added. The recombinant enzymes were collected on a column after the thermolysis stage. Then, the column washed with PBS 50 mM at pH of 8 contained 100 mM NaCl. The elution buffer was used to elute the bound recombinant enzymes (50 mM PBS pH 8, 300 mM NaCl, imidazole 100 mM). The elution fraction was dialyzed overnight used PBS buffer pH 8 at 4°C to remove any remaining SDS and imidazole. The recombinant enzyme was then concentrated using diafiltration (Merck Millipore). Using the Bradford technique and a bovine serum albumin standard, the amount of protein in the sample was determined [20]. The concentrated enzymes were used for transesterification assay.



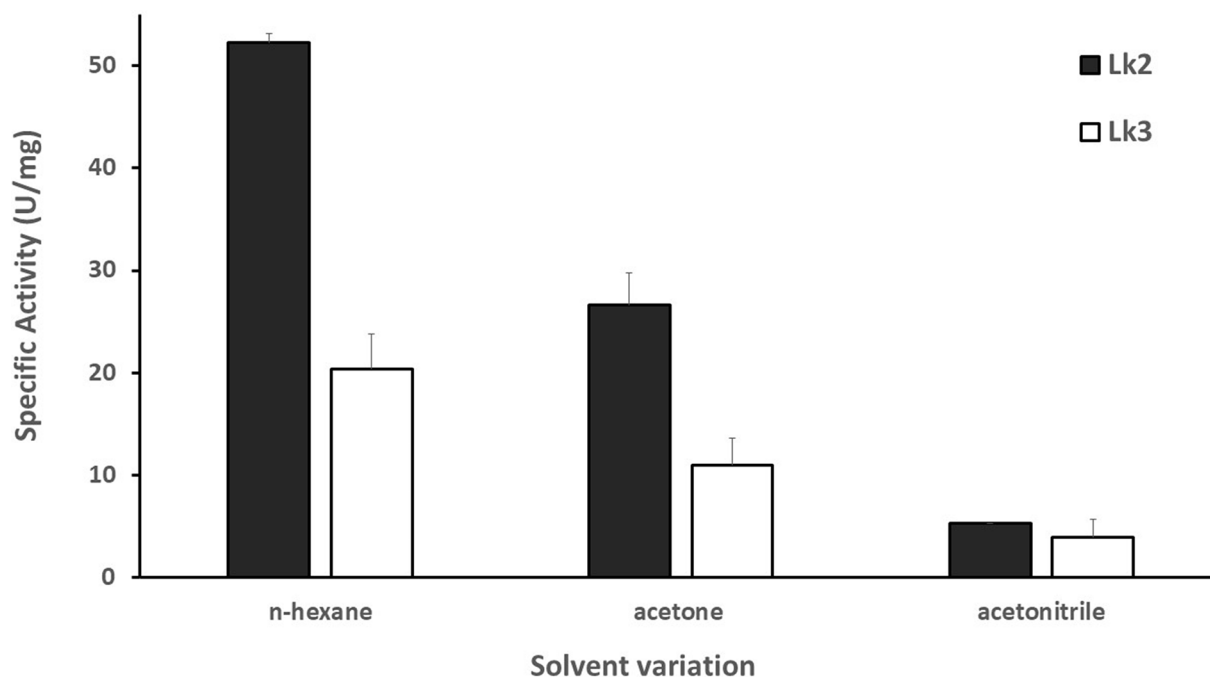

Figure 6. Activity of enzyme on variation of organic solvents

## Transesterification activity assay

Transesterification activity of recombinant lipase Lk2 and Lk3 were measured using Pohnlein method with slight modification [21]. Transesterification was performed between methyl esters and para-nitrophenol in organic solvents at various temperature. The conversion of para-nitrophenol into para-nitrophenyl esters was monitored through decreasing absorbance at 400 nm. The reaction procedures as followed: 10  $\mu$ l concentrated recombinant lipase was mixed with 990  $\mu$ l organic solvents (contained 4 mM pNP and 24 mM methyl esters). In a 2 ml reaction tube, the reaction was carried out for 10 min at 150 rpm. Enzymes precipitation were done by centrifuged the tube at 11,900 g for 3 min, then 50  $\mu$ l of the upper layer was removed and mixed with 1 ml of Tris Cl buffer pH7 (0.1 percent triton). UV-Vis spectrophotometry was used to measure the remaining pNP (Genesis 10S UV-Vis, Thermo Scientific). The amount of enzyme that released one mole of p-nitrophenyl ester in 1 min was defined as one enzymatic unit. All of the tests were carried out in triplicate, including the blanks (without the addition of enzymes).

## Purified recombinant lipase characterization

### Substrate and solvent specificity determination

Various methyl esters were used to test substrate specificity (varying fatty acids carbon chain length): laurate (C12), myristate (C14), palmitate (C16), stearate (C18), oleate (C18:1) and linoleate (C18:1) (C18:2). Various organic solvents, such as n-hexane, acetone and acetonitrile, were used to test the solvent specificity.

### Temperature's effect

Shaking at 150 rpm for 10 min in n-hexane with 4 mM p-nitrophenol and 24 mM methyl palmitate as the substrate at various temperatures (35, 40, 45, 50, 55 and 60°C) determined the optimum temperature for transesterification activity. The pure recombinant lipase was pre-incubated at temperatures (50 and 55°C) for 24 h for stability experiments, with residual activity measured every 2 h. At 0 h, the activity level was recorded as 100%.

### Determination of kinetic parameters

Bisubstrate kinetics were determined at different concentrations of methyl esters and pNP using n-hexane as a solvent at the optimal temperature of each lipase. The concentrations of pNP ranged from 0.6 to 4 mM and methyl ester from 3 to 24 mM. The  $K_m$  and  $V_{max}$  values were calculated from the Lineweaver–Burk linear regression plot. The  $k_{cat}$  values were calculated by dividing the  $V_{max}$  by the lipase concentration of the reaction mixture.

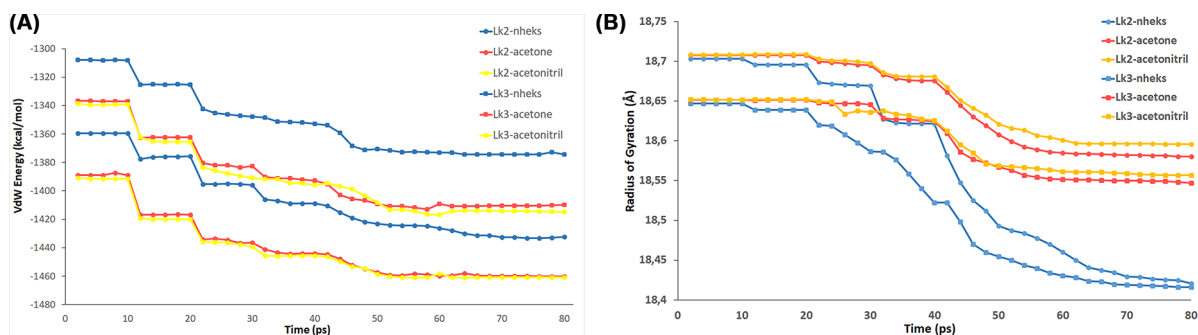

**Figure 7. Molecular dynamics simulations based on the NAMD program**  
 (A) Van Der Waals energy. (B) Radius of gyration of Lk2 and Lk3 on various organic solvents.

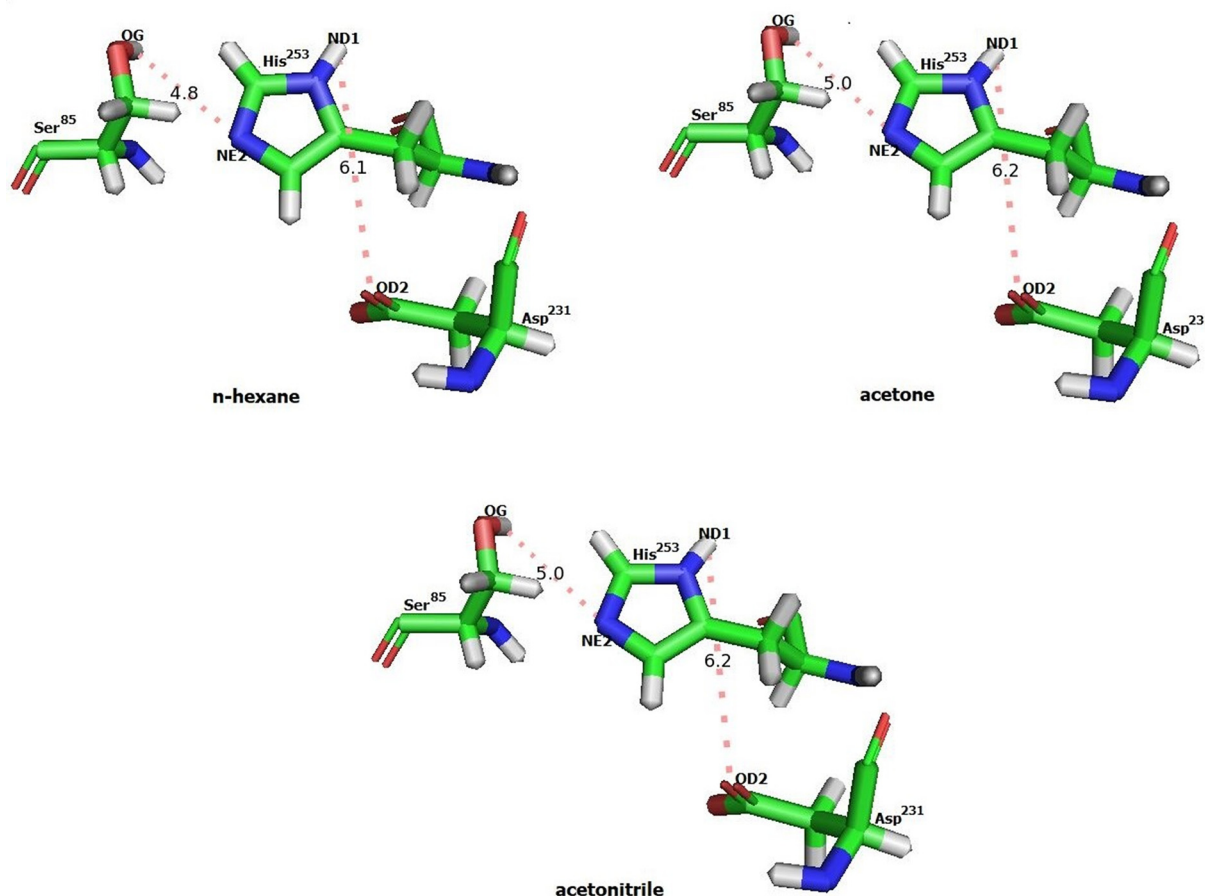

**Figure 8. Orientation of triad catalytic residues (Ser, His, Asp) on catalytic center of Lk2**  
 Distance among the residues in Angstrom (Å).

### Metal ions effect

After 30 min incubation of pure recombinant lipase in the presence of 5 mM ZnCl<sub>2</sub>, NiCl<sub>2</sub>, FeCl<sub>3</sub> and CaCl<sub>2</sub>, the residual activities were measured to investigate the influence of metal ions on transesterification activity. The activity obtained in the absence of metal ions was taken to be 100%.

### Modeling structure and docking

Homology modeling was used to construct 3D protein structures using AlphaFold2 (<https://colab.research.google.com/github/sokrypton/ColabFold/blob/main/AlphaFold2.ipynb>) [22]. Validation of the resulting structure based on

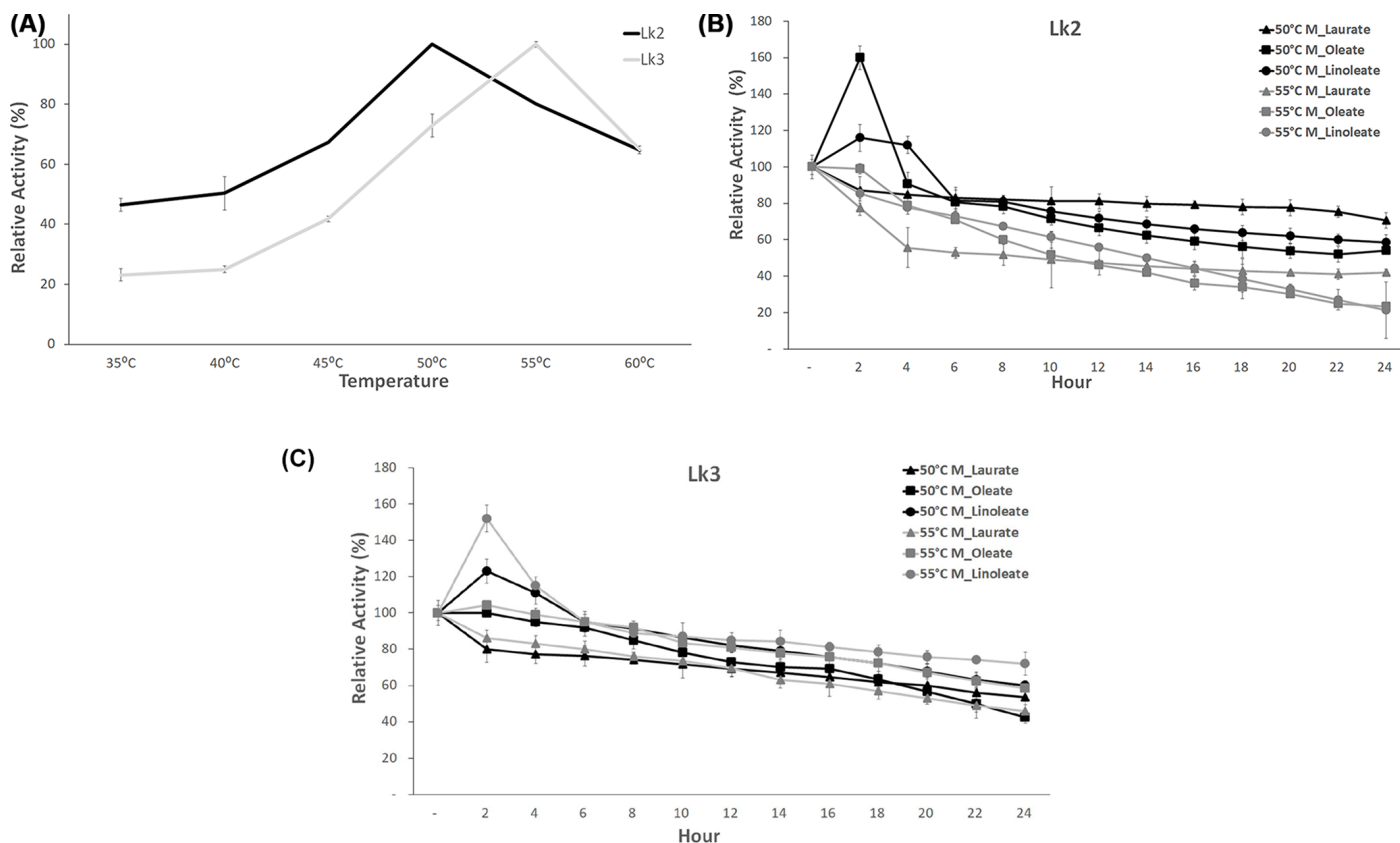

**Figure 9. Optimum temperature and thermostability**

(A) Activity of enzyme on variation temperature. (B) Thermostability of Lk2 on variation of time incubation. (C) Thermostability of Lk3 on variation of time incubation.

the Ramachandran plot using MolProbity [23]. Protein minimization was not performed to prevent amino acid residues from being present in the disallowed area on the basis of the Ramachandran plot [24]. PubChem data were used to create the ligand structure (<https://pubchem.ncbi.nlm.nih.gov/>) [25]. The ligand was then minimized by using Orca [26] and recorded as PDB with the Avogadro software [27]. Flexible docking was performed using Autodock Vina [28]. Three catalytic and two oxyanion holes residues were set as flexible, while enzymes without these five flexible residues were set as rigid receptors. Preparation for docking and grid determination were carried out by Autodock MGLTools-1.5.6 [29]. Polar hydrogen and Kollman charges were added to the enzymes structure, while Gasteiger charges were computed for the ligand. Grid dimension covered conserved region and oxyanion hole. Grid spacing was kept at 1 Å. Docking visualization using Pymol and Ligplot [30,31]. PLIP server is used to analyze protein–ligand interactions (<https://plip-tool.biotec.tu-dresden.de/plip-web/plip/index>) [32].

### Substrate binding area

The possible binding pockets for the 3D structure of Lk2 and Lk3 were predicted using Castp's online server (<http://sts.bioe.uic.edu/castp/calculation.html>). The CASTp algorithm calculates the size and volume of projected pockets [33].

### Solvent preference

Solvent preference was confirmed by dynamic molecular simulation using structure minimization in various organic solvents. This is accomplished by defining minimization using the implicit mode (implicit solvent calculations Born generalized parallel with NAMD) [34]. The GBIS model treats polar solvent as a dielectric continuum and screens electrostatic interactions between solute atoms as a result. A total of 40,000 minimization steps were performed with VMD plugin QwikMD [34]. 3D protein structure was dissolved and minimize on various organic solvents (n-hexane,

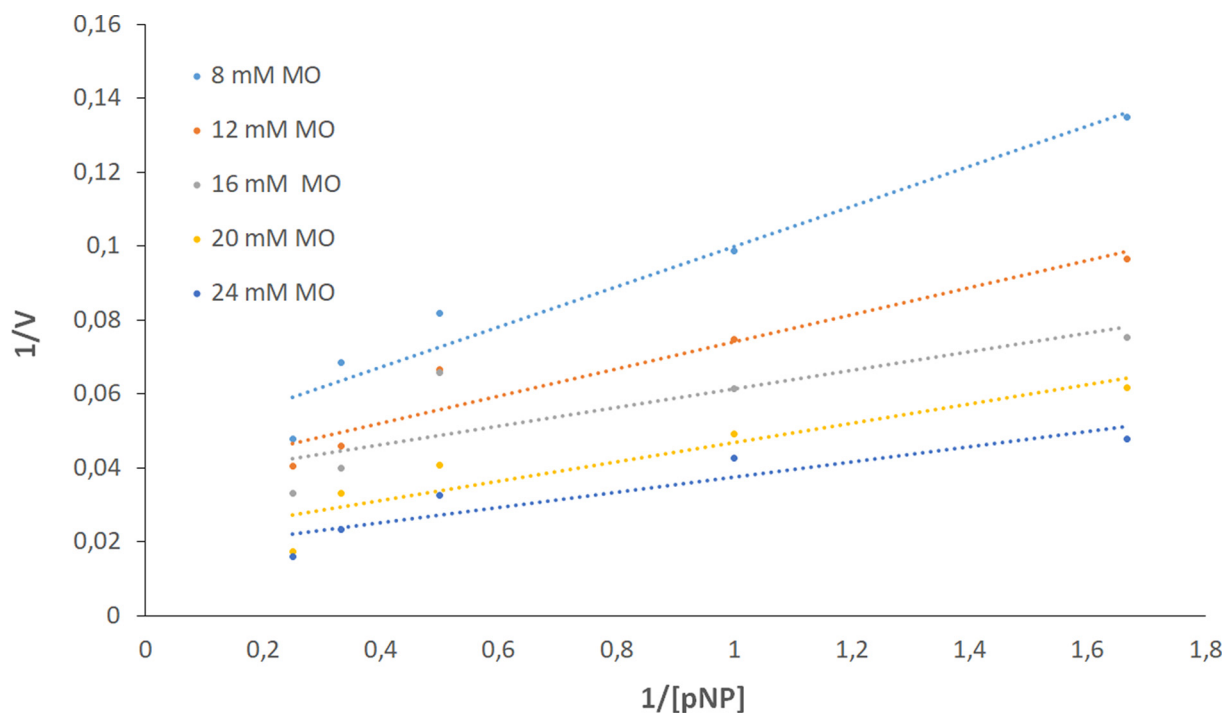

**Figure 10. Lineweaver–Burk double-reciprocal plots**

Dependence of reaction rate as a function of p-nitrophenol concentration at each fixed methyl oleate concentration using 0.48 mg/ml Lk2 concentration at 50°C in n-hexane.

acetone and acetonitrile). The adjustment of the solvent dielectric constant was carried out manually in the configuration file.

### Structure stability

The SCooP algorithm, a Gibbs–Helmholtz equation-based program that predicts protein stability assuming monomeric proteins and a two-state folding transition, was used to derive temperature-dependent protein stability predictions (<http://babylone.ulb.ac.be/SCooP>) [35]. Protein stability prediction is also analyzed by calculated hydrophobic cluster, hydrogen bond and salt bridge using ProteinTools website (<https://proteintools.uni-bayreuth.de>) [36].

### Metal ion binding

Binding potential prediction analysis for protein–metal ion were performed by uploaded .pdb file to the Metal Ion Binding servers (<http://bioinfo.cmu.edu.tw/MIB/>) [37].

## Results and discussions

### Lk2 and Lk3 expression and purification in *E. coli*

Heterologous expression of lipase *LK2* and *LK3* genes were carried out by induction with 1 mM IPTG. The proteins were fused with his tag to assist for purification. Cells were lysed by thermolysis method following addition of 0.1% SDS to obtain soluble protein. Following SDS-PAGE analysis, Lk2 and Lk3 were expressed at size around 32 and 31 kDa, respectively (Figure 1A). The proteins still showed lipolytic activity following zymography using naphtyl laurate as substrate (Figure 1B).

IMAC Ni NTA purifications was used to purify the proteins. The purified proteins still shows lipolytic activity. The specific activity of purified Lk2 and Lk3 increased 13 and 12 times compared with that of the crude extracts, respectively (Table 1). Lk2 exhibit higher activity compared with that of Lk3.



**Table 1** Transesterification activity of crude extract and purified of Lk2 and Lk3

|              | Total protein (mg) | Total activity (U) | Specific activity (U/mg) | Purification fold | Yield (%) |
|--------------|--------------------|--------------------|--------------------------|-------------------|-----------|
| C E Lk2      | 12.55              | 19.54              | 1.56                     | 1                 | 100       |
| Purified Lk2 | 0.41               | 7.72               | 20.64                    | 13.25             | 39.50     |
| C E Lk3      | 14.47              | 20.15              | 1.48                     | 1                 | 100       |
| Purified Lk3 | 0.82               | 14.33              | 17.50                    | 11.85             | 71.13     |

U = Unit activity was defined as 1  $\mu$ mol pNP decreased during reaction per min at 50°C. Methyl palmitate and p-nitrophenol was used as substrates in acetone.

CE = crude extract.

**Table 2** Docking parameters of Lk2 and Lk3 with variation of carbon-length of substrate

|                         |     | Affinity <sup>1</sup> (kcal/mol) | Hydrophobic interaction <sup>2</sup> | Hydrogen bond <sup>3</sup><br>Residue involved | Salt bridge <sup>4</sup><br>Residue involved |
|-------------------------|-----|----------------------------------|--------------------------------------|------------------------------------------------|----------------------------------------------|
| Methyl laurate (12:0)   | Lk2 | -5.3                             | 8                                    | M19 and S85                                    | H253                                         |
|                         | Lk3 | -4.6                             | 8                                    | S78                                            | H246                                         |
| Methyl miristate (14:0) | Lk2 | -5.2                             | 4                                    | M19 and S85                                    | H253                                         |
|                         | Lk3 | -4.7                             | 7                                    | -                                              | H246                                         |
| Methyl palmitate (16:0) | Lk2 | -5.3                             | 5                                    | M19 and S85                                    | H253                                         |
|                         | Lk3 | -4.8                             | 8                                    | S78                                            | H246                                         |
| Methyl stearate (18:0)  | Lk2 | -5.4                             | 8                                    | S85                                            | H253                                         |
|                         | Lk3 | -5.3                             | 6                                    | S78                                            | H246                                         |
| Methyl oleate (18:1)    | Lk2 | -5.7                             | 8                                    | M19 and S85                                    | H253                                         |
|                         | Lk3 | -5.1                             | 7                                    | -                                              | H246                                         |
| Methyl linoleate (18:2) | Lk2 | -5.7                             | 8                                    | S85                                            | H253                                         |
|                         | Lk3 | -5.1                             | 8                                    | S78                                            | H246                                         |

<sup>1</sup>Affinity energy was calculated by Autodock Vina.

<sup>2,3,4</sup>Substrate-enzyme interaction was generated by PLIP program.

M19 is one of oxyanion hole of Lk2; S<sup>85</sup> and H<sup>253</sup> are catalytic residues of Lk2. S<sup>78</sup> and H<sup>246</sup> are catalytic residues of Lk3.

## Lk2 and Lk3 substrate preference

Lipases are enzymes that are unique to a certain sort of substrate, such as carbon length [38] or a substrate with double bonds in a specific location [39]. The oxyanion hole of *P. stutzeri* lipase (Lk4) was mutated at H110F, which resulted in a shift toward a substrate with a longer carbon chain [40]. Lk2 and Lk3 activity's were investigated on various methyl ester (C12-C18) and C18 containing double bonds (C18:1, C18:2). The results showed that Lk2 activity was higher than Lk3 activity in each of the substrates tested (C12-C18, C18:1, C18:2). Furthermore, Lk2 preferred C18:1 methyl oleate and Lk3 has similar preference for a range of substrates (Figure 2).

Lk2 and Lk3 are high homology with percent identical at 89%. Characterization of the structural models by alphasfold2 showed that the closest homology to both lipases was the open lid structure of *P. aeruginosa* lipase with PDB ID: 1ex9 (Figure 3).

Both enzymes contains same catalytic triad, however, the geometry and catalytic pocket might different. Although the architecture of the catalytic triad is substantially conserved, the great diversity in the catalytic pocket region may result in varied substrate specificity [41].

Further characterization based on computational analysis showed that catalytic pocket volume of Lk2 is larger compared with that of Lk3 (Figure 4). This might due to the activity of Lk2 is higher compared with that of Lk3.

On longer carbon chain of substrated up to C18, the activity of the enzyme tends to be more higher compared with that of Lk3. Moreover docking analysis result appeared in agreement with experimental data (Table 2).

Based on affinity energy and hydrogen bond interaction between substrate and the enzymes showed that Lk2 appeared to have the best interaction with methyl oleate (C18:1) as ligand. Eventhough, the affinity energy of the C18:1 is slightly lower compared with that of C18:2, hydrogen interaction occurred with Met<sup>19</sup> and S<sup>85</sup> on C18:1 while on C18:2, the hydrogen interaction only occurred with S<sup>85</sup>. Met<sup>19</sup> and S<sup>85</sup> are known as one of oxyanion hole and catalytic triad on Lk2, respectively [19]. Comparison between interaction of C18:1 and C18:2 to Lk2 appeared

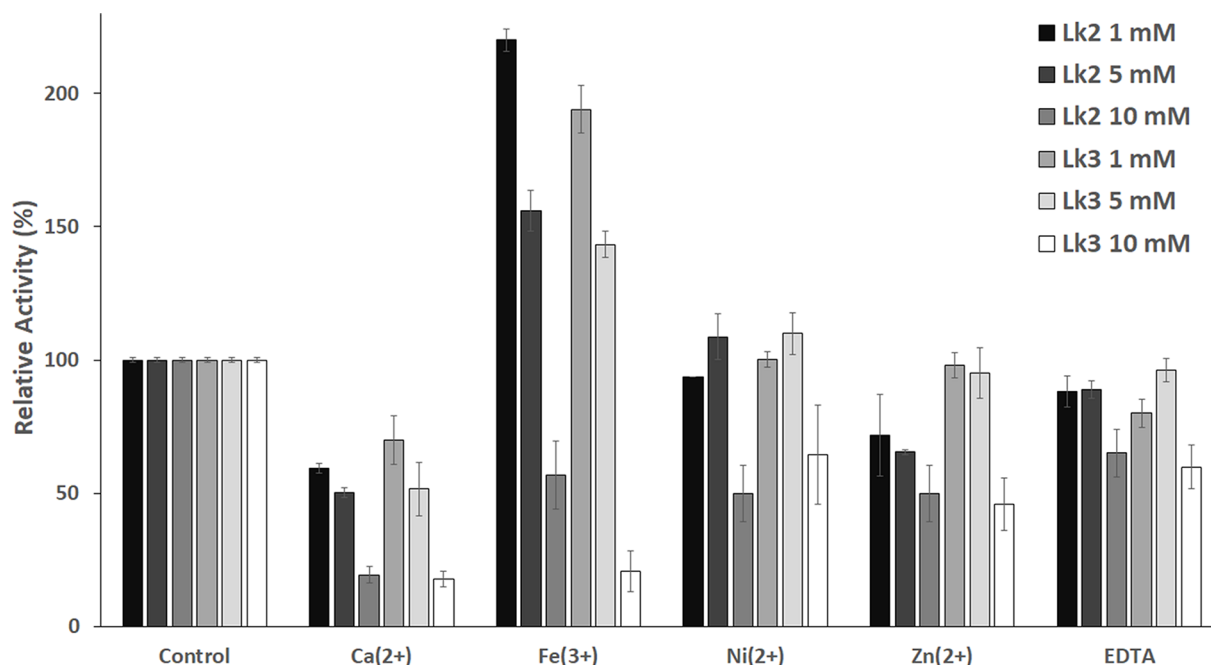

**Figure 11. Activity of enzyme on various different metal ions**

Preincubation of enzymes in 50 mM PBS buffer (pH 8) containing 1, 5 or 10 mM metal ion or EDTA for 30 min at 37°C was used to assess activity. Control without addition of metal ion.

that methyl oleate interacted with Met<sup>19</sup> and Ser<sup>85</sup>, while methyl linoleate only interacted with Ser<sup>85</sup> (Table 2). The interaction distance between methyl oleate and Ser<sup>85</sup> is longer compared with that of methyl linoleate to Ser<sup>85</sup> (Figure 5A). Meanwhile for Lk3, C18:2 was appeared as best ligand (Table 2). Eventhough, the affinity energy of C18 is slightly higher compared with that of C18:2; however, hydrogen bond distance between C18:2 to Ser<sup>78</sup> (0.16 Å) is shorter compared with that of the C18 to Ser<sup>78</sup> (0.18 Å) (Figure 5B). Ser<sup>78</sup> is one of catalytic triad on Lk3. Close orientation of catalytic triad to the substrate might cause better interaction and hence increase the activity. All of the computational results are in agreement with the experiment.

### The influence of organic solvents on Lk2 and Lk3 activity

Some lipases' activity is known to be stable in organic solvents [42]. The transesterification activity of Lk2 and Lk3 was determined using an organic solvent variant. On nonpolar liquids, both enzymes were more active (Figure 6).

The highest activity was on n-hexane. The relative activity was decreased up to 80% on acetonitrile compared with that of n-hexane, moreover on acetone the enzymes exhibited 50% activity. Similar result was reported for *Thermomyces lanuginosus* lipase [43]. Some lipases were reported to lose its activity on acetone [21]. The stability of some enzymes on organic solvent was considered to have positive correlation with thermal stability [44]. At high temperatures, the structure of lipase becomes more compact and is retained on native folding in non-polar solvents [45]. Study on the lid movements of *P. stutzeri* lipase (LipC) in water and THF showed that the lid opened wider on THF resulting of catalytic residue of serine exposed on medium [46]. Moreover, molecular dynamics simulation of LipMNK showed unfolded lipase structure on acetonitrile concentration at 80–100% [47]. The highest activity of Lk2 and Lk3 on n-hexane might due to the structure of the enzymes were keep on native folding, while on acetonitrile the structure of enzymes might be unfolded. To probe the above possibilities molecular dynamic simulation was carried out on both Lk2 and Lk3. The result showed that protein–solvent interactions were much stronger on more polar solvents (Figure 7A) in both Lk2 and Lk3 resulting on longer of radius gyration of proteins (Figure 7B).

Better interaction of solvent to protein might cause denaturation or conformation change of protein and hence reduce the activity. Previous research showed that the compact 3D structure of proteins in non-polar solvents maintained the conformation of active site [48]. The hydrogen bonding between OG (Ser)-NE2 (His) and OD2 (Asp)-ND1 (His), according to the lipase catalytic mechanism, was critical for the transition state's stabilization [49]. On Lk2, hydrogen bond distance between OG (Ser<sup>85</sup>)-NE2 (His<sup>246</sup>) and OD2 (Asp<sup>231</sup>)-ND1 (His<sup>246</sup>) is closer in n-hexane (4.8

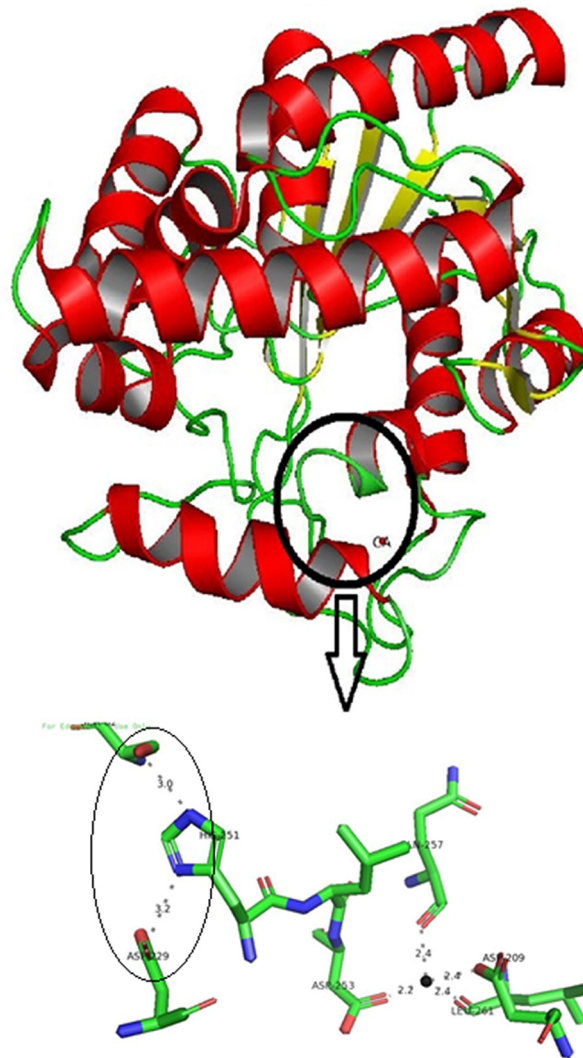

**Figure 12.** Calcium binding residues and catalytic triad of *P. aeruginosa* lipase (model enzyme for Family I.1 lipase) generated by Pymol program

Black circle is Histidine loop area. Distance among the residues in Angstrom (Å). (○) catalytic triad orientations; (●) for  $\text{Ca}^{2+}$ .

and 6.1 Å) compared with both in acetone and acetonitrile (5 and 6.2 Å) (Figure 8). This suggested that in n-hexane the enzymes maintained the conformation of the catalytic center as native structure.

### Optimum temperature and thermal stability of Lk2 and Lk3

Optimum temperature of Lk2 and Lk3 were assayed using methyl palmitate as substrate. The reactions were measured at variation of temperature range from 35 to 60°C. Lk2 and Lk3 showed temperature optimum at 50 and 55°C, respectively (Figure 9A). Most of lipases from thermophilic or thermotolerant bacteria appeared optimum lipolytic activity range at 50–70°C [15,50,51].

Lk2 and Lk3 were tested for thermostability at 50 and 55°C, respectively. The reaction was carried out using n-hexane with three different substrates (methyl laurate, methyl oleate and methyl linoleate). After 2 h of incubation at 50°C, Lk2 activity increased by 1.2- and 1.6-fold each with methyl linoleate and methyl oleate. There is no increasing activity when Lk2 incubated at 55°C. After 24 h of incubation at 50 and 55°C, the highest Lk2 activity was observed on the methyl laurate substrate in comparison with methyl oleate and methyl linoleate (Figure 9B). Meanwhile, after 2 h incubation at 50 and 55°C, Lk3 activity increased 1.2- and 1.6-fold with methyl linoleate. After a 24 h incubation period, the highest activity of Lk3 remained approximately 80% with methyl linoleate (Figure 9C).

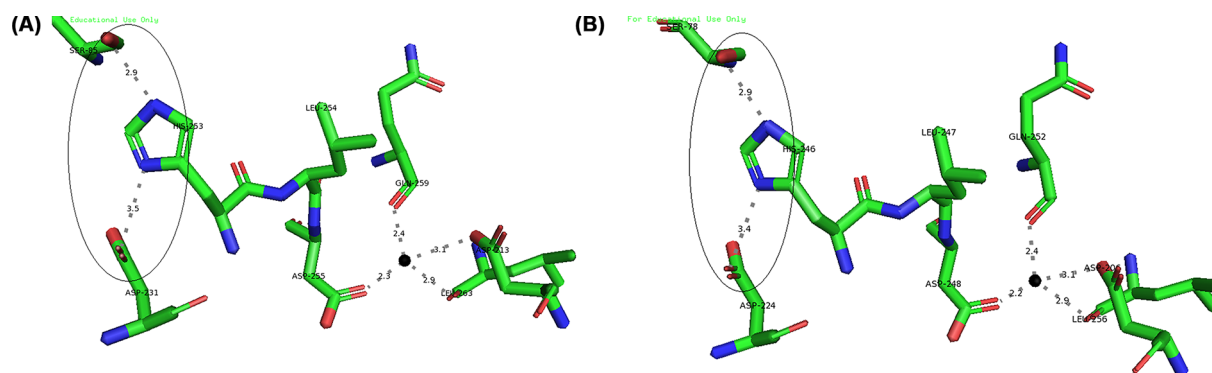

**Figure 13. Calcium binding orientation**

(A) Lk2. (B) Lk3 generated by MIB Server and visualized by Pymol program. (○) catalytic triad orientations; (●) for  $\text{Ca}^{2+}$ .

**Table 3 Folding parameter of Lk2 and Lk3 calculated by SCoOP program**

|     | $\Delta H_m$ (kcal/mol) | $\Delta C_p$ (kcal/mol K) | $T_m$ ( $^{\circ}\text{C}$ ) | $\Delta G_r$ (kcal/mol) |
|-----|-------------------------|---------------------------|------------------------------|-------------------------|
| Lk2 | -163.4                  | -2.81                     | 70.6                         | -12.8                   |
| Lk3 | -166.6                  | -2.25                     | 72.6                         | -15.2                   |

$T_m$  = melting temperature.

$\Delta H_m$  = the standard folding enthalpy measured at  $T_m$ .

$\Delta C_p$  = the standard folding heat capacity.

$\Delta G_r$  = folding free energy value at room temperature.

**Table 4 Intramolecular interaction of Lk2 and Lk3 generated by Protein Tools Server**

|     | Number of hydrophobic cluster | Number of hydrogen bond | Number of salt bridges |
|-----|-------------------------------|-------------------------|------------------------|
| Lk2 | 5                             | 59                      | 8                      |
| Lk3 | 7                             | 65                      | 8                      |

**Table 5 The kinetics parameter of transesterification activity of Lk2 and Lk3**

| Lipase | Substrates               | $V_{max}$ (U/mg) | $K_M$ ester (mM) | $K_{cat}$ $\text{s}^{-1}$ |
|--------|--------------------------|------------------|------------------|---------------------------|
| Lk2    | Methyl oleate and pNP    | 148.38           | 10.29            | 81.61                     |
|        | Methyl linoleate and pNP | 114.99           | 40.56            | 63.25                     |
| Lk3    | Methyl oleate and pNP    | 36.09            | 13.42            | 18.65                     |
|        | Methyl linoleate and pNP | 43.79            | 11.11            | 22.62                     |

Further characterization on thermal stability of the enzymes based on thermal melting prediction analysis [35] showed that Lk3 exhibited a higher  $T_m$  value ( $72.6^{\circ}\text{C}$ ) compared with that of Lk2 ( $70.6^{\circ}\text{C}$ ) (Table 3).

There are many factors influenced on thermostability of protein such as hydrophobic cluster, salt bridge and hydrogen interactions [52–54]. Structure prediction analysis of Lk2 and Lk3 showed that Lk3 contains more hydrophobic cluster and hydrogen bond interaction compared with that of Lk2, respectively (Table 4). All of the *in silico* data is agreement with the experiment that Lk3 is more thermostable compared with that of Lk2.

## Kinetics constants

The constant Michaelis ( $K_m$ ) and the  $V_{max}$  were determined from the Lineweaver–Burk double reciprocal plot. These transesterification kinetics were bisubstrate between methyl oleate and p-nitrophenol and also methyl linoleate and p-nitrophenol (Table 5).

Kinetics mechanism for Lk2 and Lk3 that were categorized as ping-pong double displacement was showed from the plot in Figure 10. Ping-pong (or double displacement) reactions have been highlighted by the formation of parallel lines on a double reciprocal plot [55,56].

The  $K_m$  values for the *Bulkholderia cepacia* lipase were 580 mM with triolein and ethanol as substrates. Commercial lipase Novozyme 435 displayed  $K_m$  values of 29 mM with waste cooking oil and ethanol as substrates. The  $K_m$  and  $V_{max}$  values for *Candida antartica* lipase A using soybean oil and methanol as substrates were 481 mM and 68.5 U/min. All these enzymes also have ping-pong Bi-Bi mechanisms as kinetics mechanism [57–59].

## Metal ions' effect on Lk2 and Lk3 activity

The activity of most enzyme is influenced by the present of metal ion, some of the ions increase the activity [60], some of them inhibit the activity [61]. Lipase family I.1 are known as  $Ca^{2+}$  dependent enzyme [3], the presence of  $Ca^{2+}$  enhanced the enzyme's activity considerably. The enzymes contain a conserved region to bind  $Ca^{2+}$ . In the presence of a variety of metal ions, the enzymes were studied to see how they affected Lk2 and Lk3 activity.  $Ca^{2+}$  and  $Zn^{2+}$  were shown to inhibit Lk2, while the present of  $Fe^{3+}$  and  $Ni^{2+}$  increased the activity of the enzyme (Figure 11). The same effect was also exhibited on the activity of Lk3 except for the present of  $Zn^{2+}$ . The activity of both lipases is slightly affected by EDTA added at a concentration of 1 and 5 mM. Activation and deactivation of both lipases were dose dependent. All metal ion variations and EDTA inhibited lipase activity at a concentration of 10 mM. Increasing the activity of same lipases on the present of  $Fe^{3+}$  were reported on *Geobacillus sp.* TW1 lipase [62] and lipase from *P. aeruginosa* [63]. Previous report proposes that redox-inert metal ions tend to stabilize negative charge on the enzyme and activating substrate, while the redox active ions might play a role as Lewis acids and as redox centers [64].

Deactivating of Lk2 and Lk3 activities in the present of  $Ca^{2+}$  were surprising since Lk2 and Lk3 were belonged to Family I.1 known as  $Ca^{2+}$ -dependent enzyme. In the present of  $Ca^{2+}$ , interaction between  $Ca^{2+}$  and amino acid residues close to histidine (one of triad catalytic) contributed to keep His at proper orientation in the catalytic center (His loop) and hence activating the enzyme [65]. Conformation or orientation of triad catalytic residues on active center of *P. aeruginosa* lipase was analysed. *Pseudomonas aeruginosa* lipase was used as model enzyme from family I.1 lipase. The result showed that the distance of Ser<sup>85</sup>-His<sup>251</sup> and His<sup>251</sup>-Asp<sup>229</sup> are 2.3 and 3.2, respectively. Moreover, the distance between  $Ca^{2+}$ -amino acid residues is within 2.2 and 2.4 Å (Figure 12). Analysis on the interaction between  $Ca^{2+}$ -amino acid residues on Lk2 and Lk3 showed that the interaction distance was longer compared with that of interaction on *P. aeruginosa* lipase (Figure 12). The phenomenon affected orientation of Histidine on active center becoming improper (Figure 13). The distance between Ser<sup>85</sup>-His<sup>253</sup> and His<sup>253</sup>-Asp<sup>231</sup> in Lk2 were 4.2 and 3.9 Å, respectively. Moreover the distance between Ser<sup>78</sup>-His<sup>246</sup> and His<sup>246</sup>-Asp<sup>224</sup> on Lk3 were 3.0 and 4.5 Å, respectively. Orientation shift on catalytic residue of Lk2 and Lk3 caused dramatically decreased on the activity of Lk2 and Lk3. Several previous studies of lipase from metagenomics isolation appeared to have different properties from their related family [66–69]. The above data suggested that Lk2 and Lk3 are unique or novel lipase on family I.1.

## Conclusion

Transesterification activity of Lk2 and Lk3 on various organic solvents was successfully characterized. Lk2 exhibited higher activity compared with that of Lk3 in various carbon length, C12-C18, C18:1 and C18:2. 3D structure prediction of Lk2 contained larger catalytic pocket compared with that of Lk3. Most preference substrate of Lk2 was methyl oleate (C18:1), while for Lk3, the highest activity was appeared on methyl linoleate (C18:2). The preference of substrate on Lk2 and Lk3 were confirmed by computational analysis. The activity of both Lk2 and Lk3 was preferentially increased when a nonpolar organic solvent was present. The enzyme-solvent interaction in n-hexane was weaker than in acetone or acetonitrile. Lk2 was less thermostable compared with that of Lk3. The folding parameter of Lk3 showed that the enzyme is more compact. The activity of both enzymes were activated by the present of  $Fe^{3+}$ ; however, in the present of  $Ca^{2+}$  the activity were inhibited. This is contradictive for lipase from family I.1, known as  $Ca^{2+}$  dependent enzyme, suggesting that Lk2 and Lk3 are novel lipase on family I.1.

## Data Availability

Lipase gene LK2 and LK3 available in GenBank (<https://www.ncbi.nlm.nih.gov/>) with accession number of KP204884 and KP204885. All data generated or analyzed during the present study are included in this article and supplementary file.

## Competing Interests

The authors declare that there are no competing interests associated with the manuscript.



## Funding

This work was supported by SIMLITABMAS PDUPT research project program, Ministry of Research, Technology and Higher Education [grant number 5E/IT1.C02/TA.00/2022] and SIMLITABMAS PDD doctoral research project program, Ministry of Research, Technology and Higher Education [grant number 2/E1/KPPTNBH/2021].

## CRedit Author Contribution

**Titin Haryati:** Conceptualization, Data curation, Software, Formal analysis, Funding acquisition, Investigation, Visualization, Methodology, Writing—original draft, Writing—review & editing. **Made Puspasari Widhiastuty:** Conceptualization, Data curation, Formal analysis, Supervision, Validation, Investigation, Project administration, Writing—review & editing. **Fida Madayanti Warganegara:** Conceptualization, Resources, Data curation, Formal analysis, Supervision, Funding acquisition, Validation, Investigation, Methodology, Project administration, Writing—review & editing. **Akhmaloka Akhmaloka:** Conceptualization, Resources, Data curation, Formal analysis, Supervision, Funding acquisition, Validation, Investigation, Methodology, Writing—original draft, Project administration, Writing—review & editing.

## Abbreviations

EDTA, ethylenediaminetetraacetate; IPTG, isopropyl  $\beta$ -D-1-thiogalactopyranoside; NAMD, Not (just) Another Molecular Dynamics; PAGE, polyacrylamide gel electrophoresis; PBS, phosphate-buffered saline; SDS, sodium dodecyl sulfate.

## References

- Rahman, R., Salleh, A.B. and Basri, M. (2013) Molecular and structural biology of new lipases and proteases. Nova Science Publishers, Incorporated, ISBN 978-1-60876-518-8
- Couturier, L., Taupin, D. and Yvergneux, F. (2009) Lipase-catalyzed chemoselective aminolysis of various aminoalcohols with fatty acids. *J. Mol. Catal. B Enzym.* **56**, 29–33, <https://doi.org/10.1016/j.molcatb.2008.04.010>
- Arpigny, J.L. and Jaeger, K.E. (1999) Bacterial lipolytic enzymes: classification and properties. *Biochem. J.* **343**, 177–183, <https://doi.org/10.1042/bj3430177>
- Hitch, T.C.A. and Clavel, T. (2019) A proposed update for the classification and description of bacterial lipolytic enzymes. *PeerJ* **7**, e7249–e7249, <https://doi.org/10.7717/peerj.7249>
- Kovacic, F., Babic, N., Krauss, U. and Jaeger, K.-E. (2019) Classification of lipolytic enzymes from bacteria. 1–35
- Borrelli, G.M. and Trono, D. (2015) Recombinant lipases and phospholipases and their use as biocatalysts for industrial applications. *Int. J. Mol. Sci.* **16**, 20774–20840, <https://doi.org/10.3390/ijms160920774>
- Sharma, S. and Kanwar, S.S. (2014) Organic solvent tolerant lipases and applications. *Sci. World J.* **2014**, 625258, <https://doi.org/10.1155/2014/625258>
- Kumar, A., Dhar, K., Kanwar, S.S. and Arora, P.K. (2016) Lipase catalysis in organic solvents: advantages and applications. *Biol. Proced. Online* **18**, 2, <https://doi.org/10.1186/s12575-016-0033-2>
- Soni, S. (2021) Trends in lipase engineering for enhanced biocatalysis. *Biotechnol. Appl. Biochem.* **69**, 265–272
- Almeida, J.M., Alnoch, R.C., Souza, E.M., Mitchell, D.A. and Krieger, N. (2020) Metagenomics: is it a powerful tool to obtain lipases for application in biocatalysis? *Biochim. Biophys. Acta - Proteins Proteomics* **1868**, 140320, <https://doi.org/10.1016/j.bbapap.2019.140320>
- Asy'ari, M., Aditiawati, P., Akhmaloka, A. and Hertadi, R. (2015) Cloning and sequence analysis of lipase gene of halophilic bacteria isolated from mud crater of Bledug Kuwu, Central Java, Indonesia. *Biosci. Biotechnol. Res. Asia* **12**, 1903–1912, <https://doi.org/10.13005/bbra/1856>
- Widhiastuty, M.P., Wahyudi, S.T., Moeis, M.R., Madayanti, F. and Akhmaloka, A. (2016) Cloning and sequence analysis of lipase gene from DMS3 isolate. *Biosci. Biotechnol. Res. Asia* **9**, 187–192
- Husin, N., Nurbaiti, S., Madayanti, F. and Akhmaloka, A. (2017) Heterologous expression of gene encoded thermostable lipase and lipolytic activity. *J. Pure Appl. Microbiol.* **11**, 135–139, <https://doi.org/10.22207/JPAM.11.1.18>
- Chandra, P., Enespa, E., Singh, R. and Arora, P.K. (2020) Microbial lipases and their industrial applications: a comprehensive review. *BioMed. Central* **19**, <https://doi.org/10.1186/s12934-020-01428-8>
- Lehmann, S.C., Maraité, A., Steinhagen, M. and Ansoerge-Schumacher, M.B. (2014) Characterization of a novel *Pseudomonas stutzeri* lipase/esterase with potential application in the production of chiral secondary alcohols. *Adv. Biosci. Biotechnol.* **5**, 1009, <https://doi.org/10.4236/abb.2014.513115>
- Van Pelt, S. et al. (2011) *Pseudomonas stutzeri* lipase: a useful biocatalyst for aminolysis reactions. *Green Chem.* **13**, 1791–1798, <https://doi.org/10.1039/c1gc15160f>
- Fauré, N. and Illanes, A. (2011) Immobilization of *Pseudomonas stutzeri* lipase for the transesterification of wood sterols with fatty acid esters. *Appl. Biochem. Biotechnol.* **165**, 1332–1341, <https://doi.org/10.1007/s12010-011-9350-8>
- Aires-Trapote, A. et al. (2015) Covalent immobilization of *pseudomonas stutzeri* lipase on a porous polymer: an efficient biocatalyst for a scalable production of enantiopure benzoin esters under sustainable conditions. *Org. Process Res. Dev.* **19**, 687–694, <https://doi.org/10.1021/op500326k>
- Nurhasanah, N., Nurbaiti, S., Madayanti, F. and Akhmaloka, A. (2015) Diversity of gene encoding thermostable lipase from compost based on metagenome analysis. ISSN 0973-8363
- Bradford, M.M. (1976) A rapid and sensitive method for the quantitation of microgram quantities of protein utilizing the principle of protein-dye binding. *Anal. Biochem.* **72**, 248–254, [https://doi.org/10.1016/0003-2697\(76\)90527-3](https://doi.org/10.1016/0003-2697(76)90527-3)

- 21 Pohnlein, M., Finkbeiner, T., Syltatk, C. and Hausmann, R. (2015) Development of a microtiter plate-based assay for the detection of lipase-catalyzed transesterifications in organic solvents. *37*, 705–710, <https://doi.org/10.1007/s10529-014-1721-0>
- 22 Mirdita, M., Schütze, K., Moriwaki, Y., Heo, L., Ovchinnikov, S. and Steinegger, M. (2022) ColabFold: making protein folding accessible to all. *Nat. Methods* **19**, 679–682, <https://doi.org/10.1038/s41592-022-01488-1>
- 23 Chen, V.B. et al. (2010) MolProbity: all-atom structure validation for macromolecular crystallography. *Acta Crystallogr. Sect. D Biol. Crystallogr.* **66**, 12–21, <https://doi.org/10.1107/S0907444909042073>
- 24 Moharana, T.R. and Rao, N.M. (2020) Substrate structure and computation guided engineering of a lipase for omega-3 fatty acid selectivity. *PLoS ONE* **15**, 1–21, <https://doi.org/10.1371/journal.pone.0231177>
- 25 Kim, S. et al. (2019) PubChem 2019 update: improved access to chemical data. *Nucleic Acids Res.* **47**, D1102–D1109, <https://doi.org/10.1093/nar/gky1033>
- 26 Neese, F. (2012) The ORCA program system. *WIREs Comput. Mol. Sci.* **2**, 73–78, <https://doi.org/10.1002/wcms.81>
- 27 Hanwell, M.D., Curtis, D.E., Lonie, D.C., Vandermeersch, T., Zurek, E. and Hutchison, G.R. (2012) Avogadro: an advanced semantic chemical editor, visualization, and analysis platform. *J. Cheminform.* **4**, 17, <https://doi.org/10.1186/1758-2946-4-17>
- 28 Trott, O. and Olson, A.J. (2010) AutoDock Vina: improving the speed and accuracy of docking with a new scoring function, efficient optimization, and multithreading. *J. Comput. Chem.* **31**, 455–461
- 29 Morris, G.M. et al. (2009) AutoDock4 and AutoDockTools4: automated docking with selective receptor flexibility. *J. Comput. Chem.* **30**, 2785–2791, <https://doi.org/10.1002/jcc.21256>
- 30 Laskowski, R.A. and Swindells, M.B. (2011) LigPlot+: multiple ligand-protein interaction diagrams for drug discovery. *J. Chem. Inf. Model.* **51**, 2778–2786, <https://doi.org/10.1021/ci200227u>
- 31 Schrödinger, L. and DeLano, W. (2020) PyMOL. Available from <http://www.pymol.org/pymol>
- 32 Salentin, S., Schreiber, S., Haupt, V.J., Adasme, M.F. and Schroeder, M. (2015) PLIP: fully automated protein-ligand interaction profiler. *Nucleic Acids Res.* **43**, W443–W447, <https://doi.org/10.1093/nar/gkv315>
- 33 Tian, W., Chen, C., Lei, X., Zhao, J. and Liang, J. (2018) CASTp 3.0: computed atlas of surface topography of proteins. *Nucleic Acids Res.* **46**, W363–W367, <https://doi.org/10.1093/nar/gky473>
- 34 Ribeiro, J.V. et al. (2016) QwikMD — Integrative molecular dynamics toolkit for novices and experts. *Sci. Rep.* **6**, 26536, <https://doi.org/10.1038/srep26536>
- 35 Pucci, F., Kwasigroch, J.M. and Rooman, M. (2017) SCOP: an accurate and fast predictor of protein stability curves as a function of temperature. *Bioinformatics* **33**, 3415–3422, <https://doi.org/10.1093/bioinformatics/btx417>
- 36 Ferruz, N., Schmidt, S. and Höcker, B. (2021) ProteinTools: a toolkit to analyze protein structures. *Nucleic Acids Res.* **49**, W559–W566, <https://doi.org/10.1093/nar/gkab375>
- 37 Lin, Y.-F., Cheng, C.-W., Shih, C.-S., Hwang, J.-K., Yu, C.-S. and Lu, C.-H. (2016) MIB: metal ion-binding site prediction and docking server. *J. Chem. Inf. Model.* **56**, 2287–2291, <https://doi.org/10.1021/acs.jcim.6b00407>
- 38 Barros, M., Fleuri, L. and Macedo, G. (2010) Seed lipases: Sources, applications and properties - a review. *Brazilian J. Chem. Eng. - BRAZ J CHEM ENG* **27**, <https://doi.org/10.1590/S0104-66322010000100002>
- 39 Kojima, Y., Sakuradani, E. and Shimizu, S. (2006) Different specificity of two types of Pseudomonas lipases for C20 fatty acids with a  $\Delta 5$  unsaturated double bond and their application for selective concentration of fatty acids. *J. Biosci. Bioeng.* **101**, 496–500, <https://doi.org/10.1263/jbb.101.496>
- 40 Ma'ruf, I.F., Widhiastuty, M.P., Suharti, S., Moeis, M.R. and Akhmaloka, A. (2021) Effect of mutation at oxyanion hole residu (H110F) on activity of Lk4 lipase. *Biotechnol. Reports* **29**, e00590, <https://doi.org/10.1016/j.btre.2021.e00590>
- 41 Furqan, B. and Akhmaloka, A. (2019) Heterologous expression and characterization of thermostable lipase (Lk1) in Pichia pastoris GS115. *Biocatal. Agric. Biotechnol.* **23**, 101448, <https://doi.org/10.1016/j.bcab.2019.101448>
- 42 Permana, A.H., Warganegara, F.M., Wahyuningrum, D., Widhiastuty, M.P. and Akhmaloka, A. (2017) Heterologous expression and characterization of thermostable lipases from Geobacillus thermoleovorans PPD2 through Escherichia coli. *Biosci. Biotechnol. Res. Asia* **14**, 1081–1088, <https://doi.org/10.13005/bbra/2545>
- 43 Fu, X., Zheng, J., Ying, X., Yan, H. and Wang, Z. (2014) Investigation of lipozyme TL IM - catalyzed transesterification using ultraviolet spectrophotometric assay. *Chinese J. Catal.* **35**, 553–559, [https://doi.org/10.1016/S1872-2067\(14\)60053-X](https://doi.org/10.1016/S1872-2067(14)60053-X)
- 44 Nadda, A., Dhar, K., Kanwar, S. and Arora, P. (2016) Lipase catalysis in organic solvents: advantages and applications. *Biol. Proced. Online* **18**, 2, <https://doi.org/10.1186/s12575-016-0033-2>
- 45 Shehata, M., Timucin, E., Venturini, A. and Sezerman, O.U. (2020) Understanding thermal and organic solvent stability of thermoalkalophilic lipases: insights from computational predictions and experiments. *J. Mol. Model.* **26**, 122, <https://doi.org/10.1007/s00894-020-04396-3>
- 46 Maraita, A., Hoyos, P., Carballeira, J., Cabrera, Á., Ansoorge-Schumacher, M. and Alcántara, A. (2013) Lipase from Pseudomonas stutzeri: purification, homology modelling and rational explanation of the substrate binding mode. *J. Mol. Catal. B Enzym.* **87**, 88–98, <https://doi.org/10.1016/j.molcatb.2012.11.005>
- 47 Herasari, D., Hertadi, R., Warganegara, F. and Akhmaloka, A. (2018) Stability and mobility of lid lipmnk in acetonitrile by molecular dynamics simulations approach. *Biosci. Biotechnol. Res. Asia* **15**, 295–299, <https://doi.org/10.13005/bbra/2632>
- 48 Li, C., Tan, T., Zhang, H. and Feng, W. (2010) Analysis of the Conformational Stability and Activity of Candida antarctica Lipase B in Organic Solvents: INSIGHT FROM MOLECULAR DYNAMICS AND QUANTUM MECHANICS/SIMULATIONS\*. *J. Biol. Chem.* **285**, 28434–28441, <https://doi.org/10.1074/jbc.M110.136200>
- 49 Carlqvist, P., Eklund, R., Hult, K. and Brinck, T. (2003) Rational design of a lipase to accommodate catalysis of Baeyer-Villiger oxidation with hydrogen peroxide. *J. Mol. Model.* **9**, 164–171, <https://doi.org/10.1007/s00894-003-0128-y>

- 50 Shah, S. and Gupta, M. (2007) Lipase catalyzed preparation of biodiesel from jatropha oil in a solvent free system. *Process Biochem.* **42**, 409–414, <https://doi.org/10.1016/j.procbio.2006.09.024>
- 51 Parwata, I.P., Asyari, M. and Hertadi, R. (2014) Organic solvent-stable lipase from moderate halophilic bacteria *Pseudomonas stutzeri* isolated from the mud crater of Bleduk Kuwu, Central Java, Indonesia. *J. Pure Appl. Microbiol.* **8**, 31–40
- 52 Salihi, A. and Alam, M. (2015) Thermostable lipases: an overview of production, purification and characterization. *Biosci. Biotechnol. Res. Asia* **11**, 1095–1107, <https://doi.org/10.13005/bbra/1494>
- 53 Panja, A.S., Bandopadhyay, B. and Maiti, S. (2015) Protein thermostability is owing to their preferences to non-polar smaller volume amino acids, variations in residual physico-chemical properties and more salt-bridges. *PLoS ONE* **10**, e0131495, <https://doi.org/10.1371/journal.pone.0131495>
- 54 Khan, F.I., Lan, D., Durrani, R., Huan, W., Zhao, Z. and Wang, Y. (2017) The lid domain in lipases: structural and functional determinant of enzymatic properties. *Front. Bioeng. Biotechnol.* **5**, 16, <https://doi.org/10.3389/fbioe.2017.00016>
- 55 Cleland, W.W. (2009) Enzyme kinetics: steady state. *eLS* **19**, 99–158, The Enzymes, Academic Press, <https://doi.org/10.1002/9780470015902.a0000719.pub2>
- 56 Stefanidis, L., Scinto, K.V., Strada, M.I. and Alper, B.J. (2018) Bisubstrate kinetics of glutathione S-transferase: a colorimetric experiment for the introductory biochemistry laboratory. *J. Chem. Educ.* **95**, 146–151, <https://doi.org/10.1021/acs.jchemed.7b00535>
- 57 Chesterfield, D., Rogers, P., Al-Zaini, E. and Adesina, A. (2012) Production of biodiesel via ethanolsysis of waste cooking oil using immobilised lipase. *Chem. Eng. J.* **s207-208**, 701–710, <https://doi.org/10.1016/j.cej.2012.07.039>
- 58 Tokuyama, H., Naito, A. and Kato, G. (2018) Transesterification of triolein with ethanol using lipase-entrapped NIPA-co-PEGMEA gel beads. *React. Funct. Polym.* **126**, 83–86, <https://doi.org/10.1016/j.reactfunctpolym.2018.03.008>
- 59 Lv, Y., Sun, S. and Liu, J. (2019) Biodiesel production catalyzed by a methanol-tolerant lipase A from *Candida antarctica* in the presence of excess water. *ACS Omega* **4**, 20064–20071, <https://doi.org/10.1021/acsomega.9b03249>
- 60 Hertadi, R. and Widhyastuti, H. (2015) Effect of Ca<sup>2+</sup> ion to the activity and stability of lipase isolated from *Chromohalobacter japonicus* BK-AB18. *Procedia Chem.* **16**, 306–313, <https://doi.org/10.1016/j.proche.2015.12.057>
- 61 Ishak, S.N.H., Masomian, M., Kamarudin, N.H.A., Ali, M.S.M., Leow, T.C. and Rahman, R.N.Z.R.A. (2019) Changes of thermostability, organic solvent, and pH stability in *Geobacillus zalihae* HT1 and its mutant by calcium ion. *Int. J. Mol. Sci.* **20**, 2561, <https://doi.org/10.3390/ijms20102561>
- 62 Li, H. and Zhang, X. (2005) Characterization of thermostable lipase from thermophilic *Geobacillus* sp. TW1. *Protein Expr. Purif.* **42**, 153–159, <https://doi.org/10.1016/j.pep.2005.03.011>
- 63 Hu, J., Cai, W., Wang, C., Du, X., Lin, J. and Cai, J. (2018) Purification and characterization of alkaline lipase production by *Pseudomonas aeruginosa* HFE733 and application for biodegradation in food wastewater treatment. *Biotechnol. Biotechnol. Equip.* **32**, 583–590, <https://doi.org/10.1080/13102818.2018.1446764>
- 64 Andreini, C., Bertini, I., Cavallaro, G., Holliday, G.L. and Thornton, J.M. (2008) Metal ions in biological catalysis: from enzyme databases to general principles. *J. Biol. Inorg. Chem. JBIC a Publ. Soc. Biol. Inorg. Chem.* **13**, 1205–1218, <https://doi.org/10.1007/s00775-008-0404-5>
- 65 Nardini, M., Lang, D.A., Liebeton, K., Jaeger, K.E. and Dijkstra, B.W. (2000) Crystal structure of *Pseudomonas aeruginosa* lipase in the open conformation. The prototype for family I.1 of bacterial lipases. *J. Biol. Chem.* **275**, 31219–31225, <https://doi.org/10.1074/jbc.M003903200>
- 66 Chu, X., He, H., Guo, C. and Sun, B. (2008) Identification of two novel esterases from a marine metagenomic library derived from South China Sea. *Appl. Microbiol. Biotechnol.* **80**, 615–625, <https://doi.org/10.1007/s00253-008-1566-3>
- 67 Chow, J. et al. (2012) The metagenome-derived enzymes LipS and LipT increase the diversity of known lipases. *PLoS ONE* **7**, e47665, <https://doi.org/10.1371/journal.pone.0047665>
- 68 Wu, C. and Sun, B. (2009) Identification of novel esterase from metagenomic library of Yangtze river. *J. Microbiol. Biotechnol.* **19**, 187–193, <https://doi.org/10.4014/jmb.0804.292>
- 69 Fu, C. et al. (2011) Molecular cloning and characterization of a new cold-active esterase from a deep-sea metagenomic library. *Appl. Microbiol. Biotechnol.* **90**, 961–970, <https://doi.org/10.1007/s00253-010-3079-0>
